# Supplementary material for: Photoinduced thiol–ene polymerization reaction for fast preparation of macroporous hybrid monoliths and their application in capillary liquid chromatography
Source: Royal Society of Chemistry journal article supplement (doi:10.1039/c4cc03451a), 2014-01-01
Supplement: c4cc03451a1.pdf [file c4cc03451a1.pdf]

*Electronic Supporting Information*

**Photoinduced thiol-ene polymerization reaction for fast preparation of  
macroporous hybrid monoliths and their application in capillary liquid  
chromatography**

Zhongshan Liu<sup>ab</sup>, Junjie Ou<sup>\*a</sup>, Hui Lin<sup>ab</sup>, Zheyi Liu<sup>ab</sup>, Hongwei Wang<sup>a</sup>, Jing Dong<sup>a</sup>, Hanfa Zou<sup>\*a</sup>

<sup>a</sup> Key Laboratory of Separation Science for Analytical Chemistry, Dalian Institute of Chemical  
Physics, Chinese Academy of Sciences, Dalian 116023, China

<sup>b</sup> University of Chinese Academy of Sciences, Beijing 100049, China

<sup>\*</sup>To whom correspondence should be addressed:

E-mail: [junjieou@dicp.ac.cn](mailto:junjieou@dicp.ac.cn) (J. Ou)

E-mail: [hanfazou@dicp.ac.cn](mailto:hanfazou@dicp.ac.cn) (H. Zou);

Fax: +86-411-84379620

Tel: +86-411-84379576 (J. Ou)

Tel: +86-411-84379610 (H. Zou)

## 22 **Experimental section**

### 23 **Materials**

24 Vinyltrimethoxysilane (VTMS) and 1,6-hexanedithiol (2SH) were purchased from J&K Scientific Ltd..  
25 Pentaerythriol tetrakis(3-mercaptopropionate) (4SH), tetravinylsilane (TVS), diethylene glycol  
26 diethyl ether (DEGDE), 2,4,6,8-tetramethyl-2,4,6,8-tetravinylcyclotetrasiloxane (TMTVS),  
27 trifluoroacetic acid (TFA), formic acid (FA), dithiothreitol (DTT), iodoacetamide (IAA),  
28 poly(ethylene glycol) (PEG, Mn=200), insulin (bovine), lysozyme (chicken egg white), bovine  
29 serum albumin (BSA), myoglobin (horse heart) and ribonuclease B (bovine pancreas) were obtained  
30 from Sigma-Aldrich (St Louis, Mo, USA). Cytochrome c (bovine heart) was obtained from Aladdin  
31 (Shanghai, China). 2,2-Dimethoxy-2-phenylacetophenone (DMPA) was purchased from Acros  
32 Organics (New Jersey, USA). Tetrahydrofuran (THF) and 1-propanol were gotten from Tianjin  
33 Kemiou Chemical Reagent Co. Ltd. (Tianjin, China). Arg-Gly, Trp-Phe, Trp-Tyr and Trp-Trp were  
34 purchased from SERVA (Germany). The flexible fused silica capillary tubing (UV transparent  
35 coating) with inner dimension of 75  $\mu\text{m}$  was purchased from Polymicro Technologies (Phoenix, AZ,  
36 USA). HPLC-grade acetonitrile (ACN) was obtained from Yuwang Group (Shandong, China) and  
37 used for preparation of mobile phases. The water used in all experiments was doubly distilled and  
38 purified by Milli-Q system (Millipore Inc., Milford, MA, USA).

### 39 **Instrumentation**

40 The thiol-ene reaction was irradiated in UV crosslinkers (XL-1500A,  $\lambda=365$  nm, Spectronics  
41 Corporation, New York, USA). The microscopic morphology of monolith material was obtained by  
42 scanning electron microscopy (SEM, JEOL JSM-5600, Tokyo, Japan). Fourier-transformed infrared  
43 spectroscopy (FT-IR) characterization was carried out on Thermo Nicolet 380 spectrometer using  
44 KBr pellets (Nicolet, Wisconsin, USA). Water contact angle was characterized on a JC2000C  
45 machine with 5  $\mu\text{L}$  water drop (Powereach, Shanghai, China). Thermogravimetry (TG) data were  
46 collected on Pyris 1 TGA (Perkin Elmer, USA). Nitrogen adsorption/desorption measurements of  
47 dried monoliths were performed on a Quadrasorb SI surface area analyzer and pore size analyzer  
48 (Quantachrome Boynton Beach, USA). Elemental analyses were performed on Vario EL III  
49 (Elementar, Hanau, Germany).

50 The cLC (capillary liquid chromatography) experiments were performed on LC system coupled with  
51 an Agilent 1100 micropump, a 7725i injector with a 20  $\mu\text{L}$  sample loop and a K-2501 UV detector  
52 (Knauer, Berlin, Germany). A T-union connector was used as a splitter, with one end connected to  
53 the monolithic column and the other connected to a blank capillary (200 cm $\times$ 50  $\mu\text{m}$  i.d.). The  
54 detection window was made by removing the polyimide coating of fused-silica capillary tubing. All  
55 chromatographic data were collected and analyzed using the software program HW-2000 from  
56 Qianpu Software (Shanghai, China).

### 57 **Preparation of bulk monoliths via thiol-ene reaction**

58 As an example for preparing monolith **I**, TMTVS (25.0 mg, 0.072 mmol), 2SH (21.3 mg, 0.142  
59 mmol), DEGDE (80  $\mu\text{L}$ ) and 1-propanol (100  $\mu\text{L}$ ) were added to a small transparent glass vial. The  
60 mixture was under sonication for 2 min, and then 1  $\mu\text{L}$  DMPA/DEGDE solution (0.4 mol  $\text{L}^{-1}$ ) was  
61 added. The obtained prepolymerization mixture was further sonication for 2 min and irradiated in  
62 UV light ( $\lambda=365$  nm, 120  $\text{mJ cm}^{-2}$ ) for 10 min. The cured bulk monoliths were extracted with ethanol  
63 to remove residuals for three times.

64 Similarly, the bulk monoliths (**II-IV**) were prepared according to the composition of  
65 prepolymerization mixtures as listed in Table 1. For the following characterization, the bulk  
66 monoliths were cut into small pieces and grinded using mortar and pestle. Then the grinding powders  
67 were dried in a vacuum at 50  $^{\circ}\text{C}$  for two days.

### 68 **Preparation of monolithic columns via thiol-ene reaction**

69 Before preparing monolithic columns, the inner wall of fused-silica capillary was pretreated and  
70 modified with VTMS for anchoring monolith matrix. Briefly, the capillary was rinsed using 1.0 mol  
71  $\text{L}^{-1}$  NaOH, water, 1.0 mol  $\text{L}^{-1}$  HCl and water for 2 h, successively. After being dried under nitrogen  
72 stream, the capillary was filled with VTMS solution in methanol (50%, v/v), sealed with rubbers at  
73 both ends and submerged in water bath at 50  $^{\circ}\text{C}$  for 12 h. Finally, the capillary was rinsed with  
74 methanol to flush out the residual reagent and dried under nitrogen flow. The pretreated capillary  
75 was cut into a certain length, into which the above-mentioned prepolymerization mixture was  
76 introduced with a syringe. After sealing both ends with rubbers, the capillary was irradiated by UV  
77 light ( $\lambda=365$  nm, 120  $\text{mJ cm}^{-2}$ ) for 10 min. The obtained monolithic columns were then flushed with

78 methanol to remove residuals.

## 79 **Separation of proteins on nano-HPLC system**

80 Standard proteins were separated on an Eksigent one dimensional Plus Nano-HPLC system  
81 (Eksigent, Dublin, CA) equipped with a UV detector K-2520 from Knauer (Berlin, Germany). 1  $\mu$ L of  
82 the standard protein mixture (about 5  $\mu$ g mL<sup>-1</sup> of each protein in water) was directly loaded to the  
83 analytical column using 100% water (containing 0.1% TFA) before gradient elution. The detection  
84 was using a 5 nL flow cell with the detection wavelength set at 214 nm. All the chromatography data  
85 were collected and analyzed by Eksigent Control Software.

## 86 **Preparation of BSA tryptic digest and analysis on cLC-MS/MS**

87 To a 10 mL centrifuge tube were added 2 mg BSA, and 1 mL of denaturing buffer containing 8 mol  
88 L<sup>-1</sup> urea and 0.1 mol L<sup>-1</sup> ammonium bicarbonate. After the addition of 20  $\mu$ L of DTT (20 mmol L<sup>-1</sup> in  
89 water) solution, the mixture was incubated at 60 °C for 1 h. And then, 7.4 mg IAA was added and the  
90 mixture was incubated at room temperature in the dark for 40 min. The mixture was diluted 8-fold  
91 with 0.1 mol L<sup>-1</sup> ammonium bicarbonate buffer and digested for 16 h in the presence of trypsin  
92 (trypsin/BSA=1/25, w/w). After digesting, the pH of mixture was adjusted to 2-3 by 10% TFA  
93 aqueous solution. Solid-phase extraction (SPE) was performed with a homemade C18 cartridge. The  
94 collected peptides were dried under vacuum and dissolved in a 0.1% formic acid aqueous solution (2  
95 mL), and then stored in a -20 °C freezer before cLC-MS/MS analysis.

96 The cLC-MS/MS experiment was carried out by interfacing a surveyor MS pump to a Finnigan LTQ  
97 ion trap mass spectrometer (Finnigan MAT, ThermoFinnigan, San Jose, CA). Mobile phase A was  
98 water (containing 0.1% FA), and mobile phase B was ACN (0.1% FA). Tryptic digest was  
99 automatically injected onto the column with 100% mobile phase A for 5min. And then the trapped  
100 peptides were separated on monolithic column (25 cm $\times$ 75  $\mu$ m i.d.) with gradient elution from 5% to  
101 35% mobile phase B in 90 min. The LTQ linear ion trap mass spectrometer equipped with a  
102 nanospray ion source. The temperature of the ion transfer capillary was set at 200 °C. The spray  
103 voltage was set at 1.8 kV, and the normalized collision energy was set at 35.0%. One microscan was  
104 set for each MS and MS/MS scan. All MS and MS/MS spectra were acquired in the data dependent  
105 mode. The mass spectrometer was set that one full MS scan was followed by six MS/MS scans on

106 the six most intense ions. The dynamic exclusion function was set as follows: repeat count 2, repeat  
107 duration 30 s, and exclusion duration 90 s. System control and data collection were done by Xcalibur  
108 software version 1.4 (Thermo, USA). The scan range was set from m/z 400 to m/z 1600.

109

110

111

112

113

114

115

116

117

118

119

120

121

122

123

124

125

126

127

128

## 129 Supplementary Figures

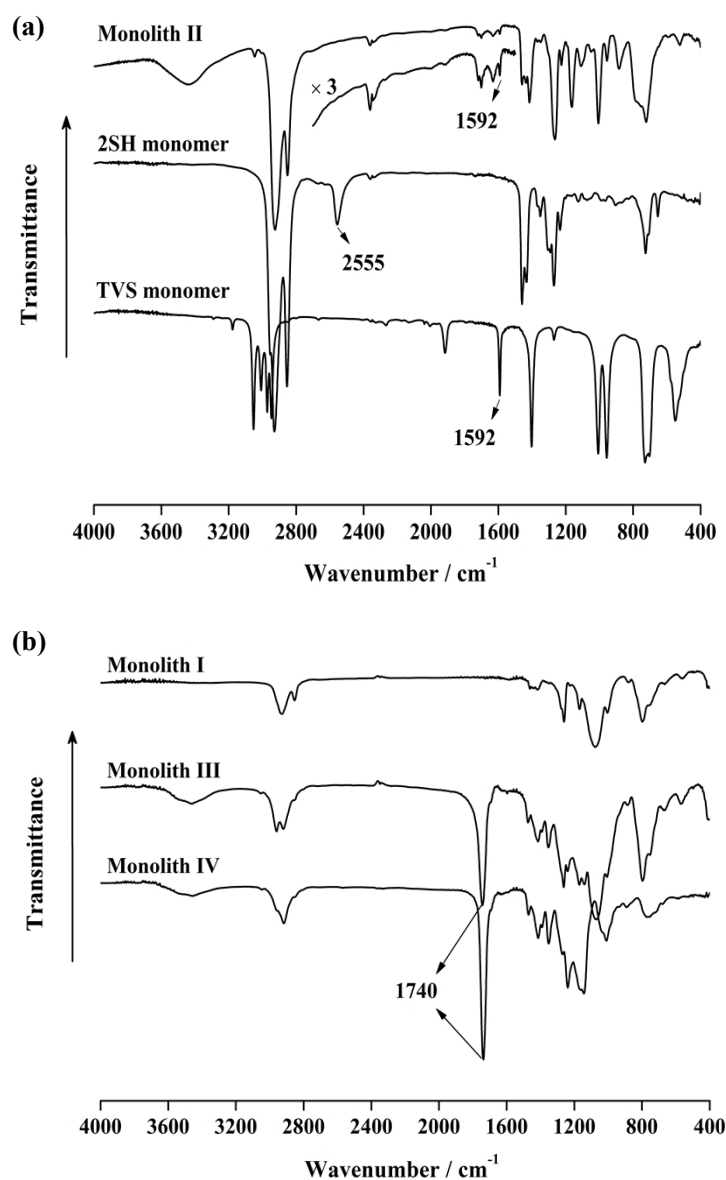

150 **Fig. S1** FT-IR spectra of (a) the TVS and 2SH monomers, and monolith **II**; (b) monoliths **I**,  
 151 **III** and **IV**.

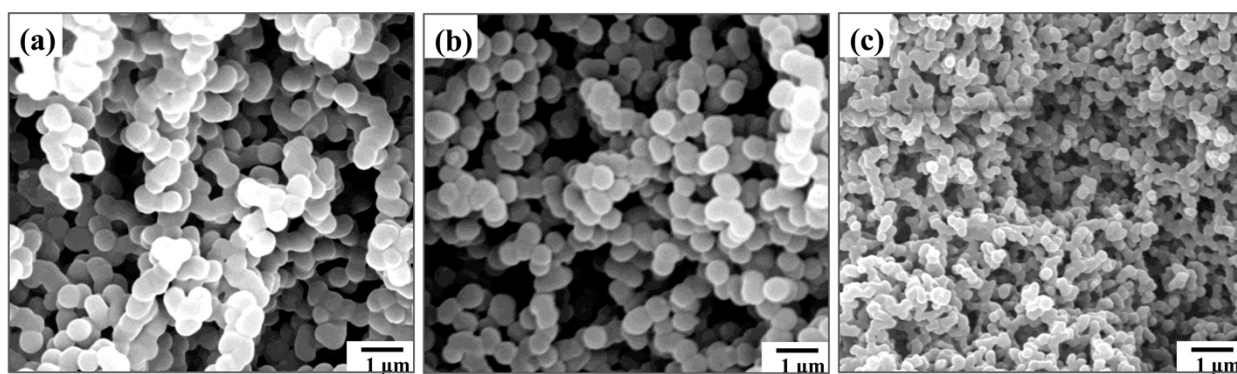

**Fig. S2** SEM micrographs of hybrid monoliths using different porogenic solvents (a) TVS/2SH (15.5/26.8, mg/mg) with DEGDE/1-propanol (170/10, v/v); (b) and (c) TVS/4SH (17/45, mg/mg) with DEGDE/1-propanol (103/137, v/v) and DEGDE/PEG200 (140/80, v/v), respectively.

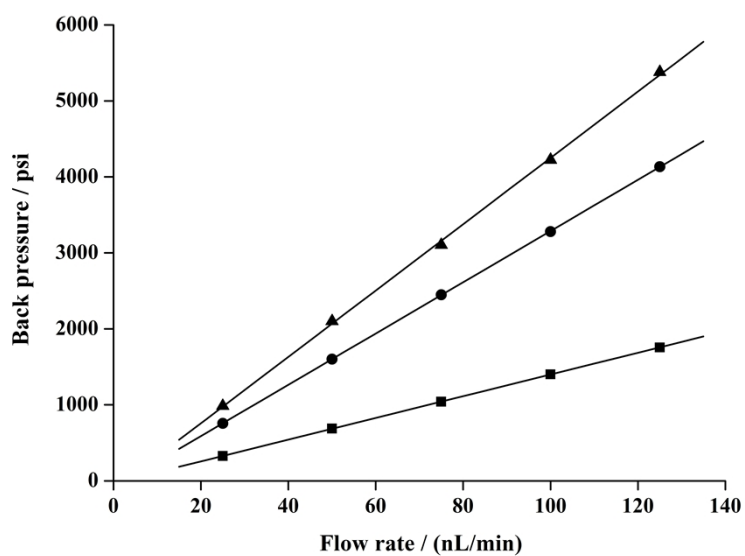

**Fig. S3** The relationship between flow rate and back pressure drop on hybrid monolith **II** prepared with different ratio of THF/DEGDE (30/150, (■); 35/145, (●) and 40/140, (▲), v/v). Experimental conditions: column length, 22.8 cm×75 μm i.d.; mobile phase, ACN/water (40/60, v/v).



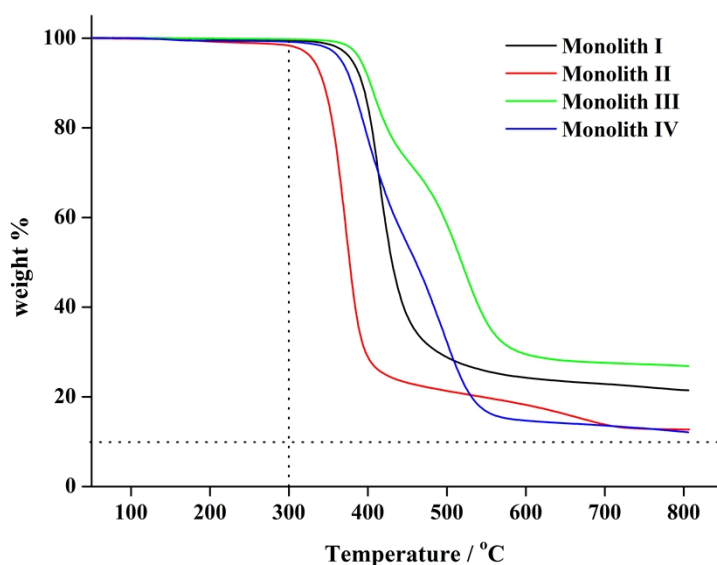

**Fig. S4** TG analysis of monoliths **I-IV** at a heating rate of 10 °C min<sup>-1</sup> under air atmosphere, indicating that pyrolysis begins from about 300 °C.

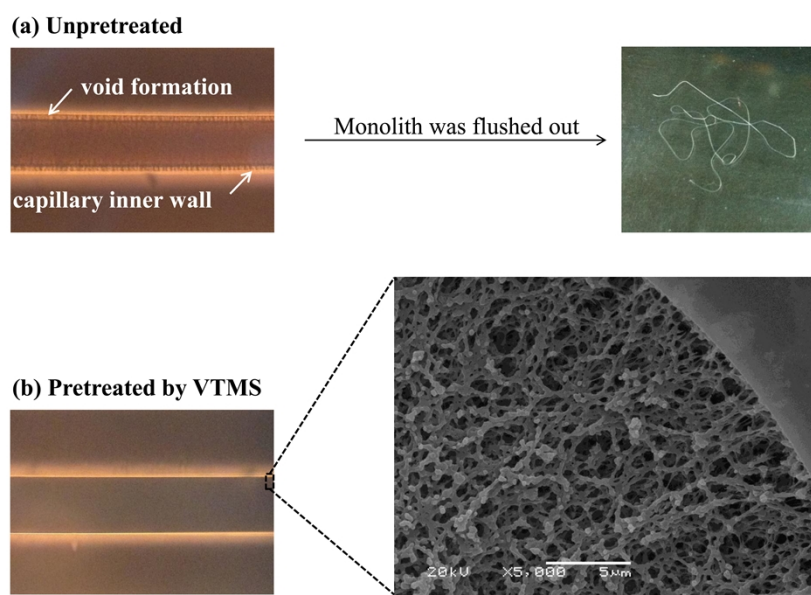

**Fig. S5** (a) void formation between monolith and inner wall in the unpretreated capillary. (b) SEM micrograph of hybrid monolith **II** being anchored to the inner wall of UV-transparent capillary pretreated with VTMS.

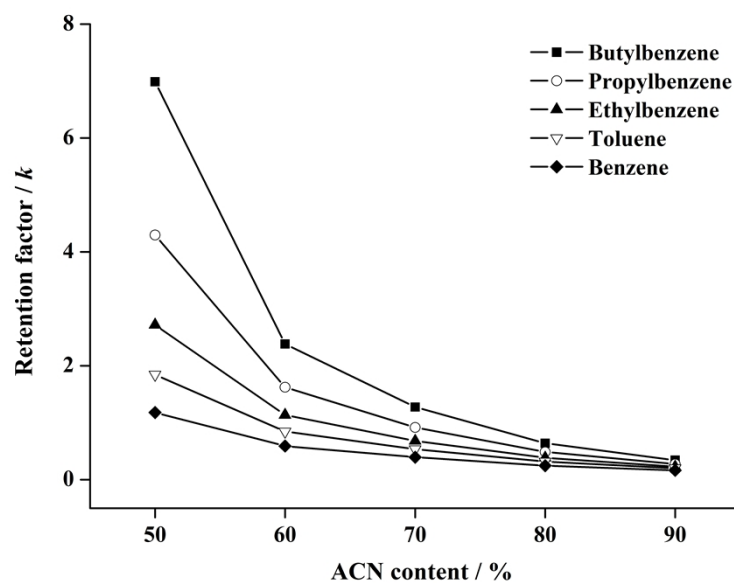

**Fig. S6** The effect of ACN content in mobile phases on retention factors of alkylbenzenes on monolith **II**. Experimental conditions: effective length, 25 cm×75  $\mu\text{m}$  i.d.; flow rate, 100  $\mu\text{L min}^{-1}$  (before split); detection wavelength, 214 nm.

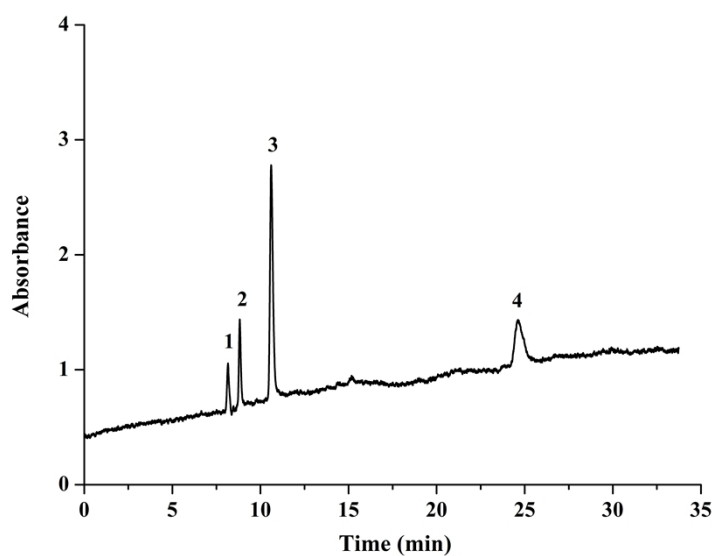

**Fig. S7** Separation of peptides on hybrid monolith **II** by cLC under isocratic condition. Analytes: (1) Arg-Gly, (2) Trp-Phe, (3) Trp-Tyr and (4) Trp-Trp. Experimental conditions: effective length, 25 cm×75  $\mu$ m i.d.; mobile phase, ACN/triethylammonium acetate solution (pH=4.2), (10/90, v/v); flow rate, 80  $\mu$ L min<sup>-1</sup> (before split); detection wavelength, 214 nm.

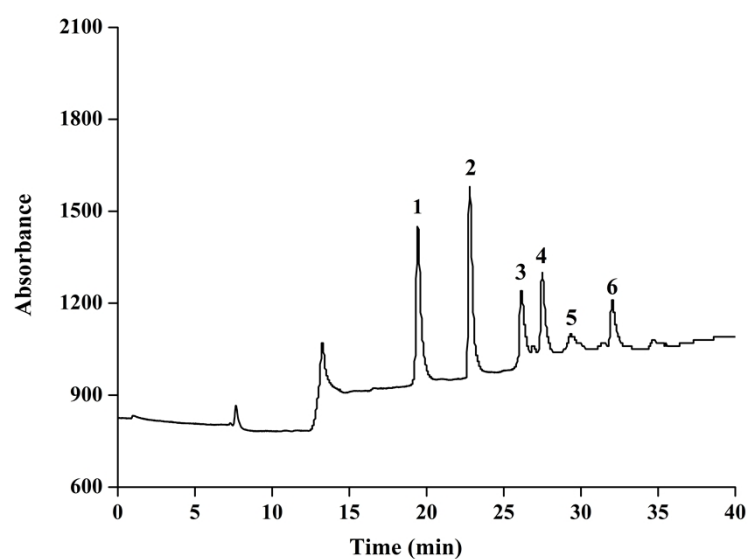

**Fig. S8** Separation of proteins on hybrid monolith **II** by nano-HPLC. Solute of standard protein mixture: (1) ribonuclease B, (2) cytochrome c, (3) insulin, (4) lysozyme, (5) BSA and (6) myoglobin; Experimental conditions: effective length, 28 cm×75  $\mu$ m i.d.; mobile phase A, water with 0.1% TFA, mobile phase B, ACN with 0.1% TFA; gradient, 5% B to 35% B in 30 min; flow rate, 300 nL min<sup>-1</sup>; detection wavelength, 214 nm.

371 **Supplementary Tables**

372 **Table S1** The theoretical and calculated silicon content in monoliths

| 373 | Monolith        | I    | II  | III  | IV  |
|-----|-----------------|------|-----|------|-----|
| 374 | Theoretical (%) | 17.5 | 7.5 | 15.6 | 5.6 |
| 375 | Calculated (%)  | 10.5 | 6.0 | 12.9 | 5.6 |

376

377

378

379

380

381

382

383

384

385

386

387

388

389

390

391

392

393

394

395

396

397

398

399

400

401 **Table S2** Carbon and hydrogen contents in monoliths

| 402 | Monolith     | <b>I</b> | <b>II</b> | <b>III</b> | <b>IV</b> |
|-----|--------------|----------|-----------|------------|-----------|
| 403 | Carbon (%)   | 44.42    | 55.50     | 41.47      | 48.10     |
| 404 | Hydrogen (%) | 8.04     | 9.23      | 6.18       | 6.42      |

405

406

407

408

409

410

411

412

413

414
